# Supplementary material
Source: PubMed Central journal article supplement (PMC6902166)
Supplement: jama-322-2084-s002.pdf [file jama-322-2084-s002.pdf]

## Supplementary Online Content

Hoskin PJ, Hopkins K, Misra V, et al. Effect of single-fraction vs multifraction radiotherapy on ambulatory status among patients with spinal canal compression from metastatic cancer *JAMA*. doi:10.1001/jama.2019.17913

### **Supplement 2.** Statistical analysis plan

This supplementary material has been provided by the authors to give readers additional information about their work.

## SCORAD

### STATISTICAL ANALYSIS PLAN

---

|                                         |                                                                                                   |
|-----------------------------------------|---------------------------------------------------------------------------------------------------|
| <b>Date prepared</b>                    | 11 Oct 2012                                                                                       |
| <b>Version number</b>                   | 1.0                                                                                               |
| <b>Prepared by (trial statistician)</b> | Latha Kadalayil                                                                                   |
| <b>Reviewed by (trial statistician)</b> | Andre Lopes                                                                                       |
| <b>Approved by</b>                      | Allan Hackshaw  |
| <b>Date approved</b>                    | 13 January 2013                                                                                   |

---

#### Contents

1. Summary description of the trial
2. Recruitment, follow-up, and baseline characteristics
3. Treatment compliance
4. Efficacy
5. Adverse events
6. Other analyses

## 1. Summary description of the trial

|                                                |                                                                                                                                                              |
|------------------------------------------------|--------------------------------------------------------------------------------------------------------------------------------------------------------------|
|                                                |                                                                                                                                                              |
| Trial objectives                               | To show that ambulatory status using 8Gy in 1 fraction is no worse than with 20Gy in 5 fractions for patients with metastatic spinal cord compression (SCC). |
|                                                |                                                                                                                                                              |
| Sample size                                    | 700 patients                                                                                                                                                 |
|                                                |                                                                                                                                                              |
| Intervention arms (what treatments were given) | Randomised phase III trial                                                                                                                                   |
|                                                | Arm 1: Multiple fraction radiotherapy 20Gy/5f<br>Arm 2: Single fraction radiotherapy 8Gy/1f                                                                  |
|                                                |                                                                                                                                                              |
| Primary outcome measure                        | Ambulatory status at 8 weeks from day 1 of treatment compared to the same at randomisation.                                                                  |
|                                                |                                                                                                                                                              |
| Secondary outcome measures                     | Recovery of and time to ambulation                                                                                                                           |
|                                                | Ambulatory status at 1, 4 and 12 weeks compared to randomisation (where available)                                                                           |
|                                                | Maintenance of ambulatory status                                                                                                                             |
|                                                | Bladder and bowel function at 1, 4, 8 and 12 weeks from day 1 of treatment compared to randomisation                                                         |
|                                                | Adverse events using RTOG and CTCAE v.4.0 at 1, 4, 8 and 12 weeks from day 1 of treatment                                                                    |
|                                                | Quality of life measured using the EORTC QLQ-C30 questionnaire at 1, 4, 8 and 12 weeks from day 1 of treatment compared to the same at randomisation         |
|                                                | Further treatment                                                                                                                                            |
|                                                | Duration of care in hospital, hospice, nursing home or home                                                                                                  |
|                                                | Preferred place of care                                                                                                                                      |
|                                                | Overall survival at 12 weeks and 12 months                                                                                                                   |
|                                                |                                                                                                                                                              |

## 2. Recruitment, follow-up, and baseline characteristics

The following should be obtained:

- The month and year between which patients were recruited (eg between January 2000 and June 2006)
- The age range of patients recruited (eg 25 to 87 years)
- The number of centres that recruited patients
- The country (or countries) from which patients were recruited
- The length of follow up (patients who have died should be censored). This is obtained for all patients, and in each trial arm (to check that they are similar)
- A table of baseline characteristics, in each trial arm. This should contain age, gender, and any stratification factors used in the randomisation. Other variables could be disease stage, performance status/ECOG score, body weight, and other key biological and physiological measurements.
  - For categorical variables, each column will contain N (%)
  - For continuous variables, each column will contain the mean or median value, and in brackets, the standard deviation or 25-75<sup>th</sup> centile values
  - P-values for comparing the trial arms should not be reported (see Senn SJ (1994) Testing for baseline balance in clinical trials, *Statistics in Medicine* 13: 1715-1726)
- The number of patients who were ineligible in each trial arm, and the reasons why they were ineligible
- The number of patients who were recruited to the trial but withdrew later on, and the reasons (if available)
- List any possible major protocol violations or ineligibility criteria that would lead to the patient not being included in the analysis, eg patient later found not to have the cancer of interest

### 3. Treatment compliance

#### Compliance to radiotherapy

|                               | 20 Gy/5 fractions<br>N=? | 8 Gy/1 fraction<br>N=? |
|-------------------------------|--------------------------|------------------------|
| Exactly as per protocol       |                          |                        |
|                               |                          |                        |
| Reasons for non-compliance    |                          |                        |
| Died during treatment         |                          |                        |
| Too ill to complete treatment |                          |                        |
| Withdrew from trial           |                          |                        |
| Administrative error          |                          |                        |
| Other reasons                 |                          |                        |
| Reason 1                      |                          |                        |
| Reason 2                      |                          |                        |
| etc                           |                          |                        |
| Reason not reported           |                          |                        |

**Reasons for non-compliance contd.....**

|                                         | 20 Gy/5 fractions<br>N=? | 8 Gy/1 fraction<br>N=? |
|-----------------------------------------|--------------------------|------------------------|
| Reasons for delay                       |                          |                        |
| reason 1                                |                          |                        |
| reason 2                                |                          |                        |
| etc                                     |                          |                        |
| Reasons for interruptions               |                          |                        |
| reason 1                                |                          |                        |
| reason 2                                |                          |                        |
| etc                                     |                          |                        |
| Reasons for dose reduction              |                          |                        |
| reason 1                                |                          |                        |
| reason 2                                |                          |                        |
| etc                                     |                          |                        |
| Reasons for stopping protocol treatment |                          |                        |
| reason 1                                |                          |                        |
| reason 2                                |                          |                        |
| etc                                     |                          |                        |

**4. Efficacy**

The following statistical analyses will be performed:

- Logrank test
- Cox regression modelling (to allow for covariates)
- Kaplan-Meier plots

Check model assumptions:

- Time-to-event data: eg use Schoenfeld residuals or a p-value to test the assumption of proportional hazards
- Continuous data: examine Normal probability plots, and look for a straight line. If very curved, take logs of the data or other transformation

**Primary endpoint:**

Ambulatory status at 8 weeks from day 1 of treatment compared to randomization (based on evaluable patients).

|                                              | Treatment                   |                             | Risk difference<br>(90% CI)<br>8 Gy-20Gy | Risk difference<br>(95% CI)<br>8 Gy-20Gy | P-value |
|----------------------------------------------|-----------------------------|-----------------------------|------------------------------------------|------------------------------------------|---------|
|                                              | 20 Gy/<br>1 fraction<br>N=? | 8 Gy/<br>5 fractions<br>N=? |                                          |                                          |         |
|                                              | % (n)                       |                             |                                          |                                          |         |
| Evaluable patients                           |                             |                             |                                          |                                          |         |
| Positive response                            |                             |                             |                                          |                                          |         |
| Maintenance of 1 2 level                     |                             |                             |                                          |                                          |         |
| Change from 3 4 to 1 2                       |                             |                             |                                          |                                          |         |
| <b>Overall positive response</b>             |                             |                             |                                          |                                          |         |
| Negative response                            |                             |                             |                                          |                                          |         |
| Change from 1 2 to 3 4                       |                             |                             |                                          |                                          |         |
| Remained at 3 4                              |                             |                             |                                          |                                          |         |
| Died before 8 weeks' assessment <sup>#</sup> |                             |                             |                                          |                                          |         |
| Withdrew from trial/consent                  |                             |                             |                                          |                                          |         |
| Not assessed (patient too ill)               |                             |                             |                                          |                                          |         |
| Patient refused assessment                   |                             |                             |                                          |                                          |         |
| Lost to follow-up                            |                             |                             |                                          |                                          |         |
| Unknown                                      |                             |                             |                                          |                                          |         |
| Other reasons                                |                             |                             |                                          |                                          |         |
| 1                                            |                             |                             |                                          |                                          |         |
| 2                                            |                             |                             |                                          |                                          |         |
| etc                                          |                             |                             |                                          |                                          |         |

<sup>#</sup>Percentages based on the total number per treatment arm

**Other endpoints**

**a) Survival analyses**

**Analyses should be intention-to-treat**

|                                            | 20 Gy/1 fraction<br>N=? | 8 Gy/5 fractions<br>N=? |
|--------------------------------------------|-------------------------|-------------------------|
| <b>Overall survival (OS)</b>               |                         |                         |
| Number of deaths                           |                         |                         |
| Median OS (months), 95% CI (or IQR)        |                         |                         |
|                                            |                         |                         |
| 12 weeks' survival rate (95% CI)           |                         |                         |
| 1 year survival rate (95% CI)              |                         |                         |
|                                            |                         |                         |
| <b>Time to recovery of ambulation*</b>     |                         |                         |
| Number of events                           |                         |                         |
| Median time to recovery (weeks), 95% CI    |                         |                         |
|                                            |                         |                         |
| 12 weeks' rate (95% CI)                    |                         |                         |
| <b>Time to ambulation**</b>                |                         |                         |
| Number of events                           |                         |                         |
| Median time to ambulation (months), 95% CI |                         |                         |
|                                            |                         |                         |
| 12 weeks' rate (95% CI)                    |                         |                         |

\*In those patients with level 3|4 ambulatory status

\*\*In those patients with level 1|2 ambulatory status

For time-to-event data, provide Kaplan-Meier curves, with number of patients at risk in each treatment group below the x-axis.

All time points should start from the date of registration.



**Cause of death**

|                                                   | 20 Gy/1 fraction<br>N=? | 8 Gy/5 fractions<br>N=? |
|---------------------------------------------------|-------------------------|-------------------------|
| Primary cancer                                    |                         |                         |
| Treatment                                         |                         |                         |
| Combination of cancer related & treatment related |                         |                         |
| Other                                             |                         |                         |
| Not known                                         |                         |                         |

**b) Change in ambulatory status at 4 and 12 weeks**

Similar table as in the primary endpoint (see page 6)

c) Bladder, bowel function at 1, 4, 8 and 12 weeks from day 1 of treatment compared to randomisation

|                    | Baseline          |                  | Week 1            |                  | Week 4            |                  | Week 8            |                  | Week 12           |                  |
|--------------------|-------------------|------------------|-------------------|------------------|-------------------|------------------|-------------------|------------------|-------------------|------------------|
|                    | 20 Gy/5 fr<br>N=? | 8 Gy/1 fr<br>N=? |
|                    | % (n)             |                  |                   |                  |                   |                  |                   |                  |                   |                  |
| Bladder function   |                   |                  |                   |                  |                   |                  |                   |                  |                   |                  |
| Evaluable patients |                   |                  |                   |                  |                   |                  |                   |                  |                   |                  |
| Normal             |                   |                  |                   |                  |                   |                  |                   |                  |                   |                  |
| Abnormal           |                   |                  |                   |                  |                   |                  |                   |                  |                   |                  |
| Bowel function     |                   |                  |                   |                  |                   |                  |                   |                  |                   |                  |
| Evaluable patients |                   |                  |                   |                  |                   |                  |                   |                  |                   |                  |
| Normal             |                   |                  |                   |                  |                   |                  |                   |                  |                   |                  |
| Abnormal           |                   |                  |                   |                  |                   |                  |                   |                  |                   |                  |

d) Place of care

|                           | Week 1            |                  | Week 4            |                  | Week 8            |                  | Week 12           |                  |
|---------------------------|-------------------|------------------|-------------------|------------------|-------------------|------------------|-------------------|------------------|
|                           | 20 Gy/5 fr<br>N=? | 8 Gy/1 fr<br>N=? |
|                           | % (n)             |                  |                   |                  |                   |                  |                   |                  |
| Place of care             |                   |                  |                   |                  |                   |                  |                   |                  |
| <u>Evaluable patients</u> |                   |                  |                   |                  |                   |                  |                   |                  |
| Home/with relatives       |                   |                  |                   |                  |                   |                  |                   |                  |
| Care home                 |                   |                  |                   |                  |                   |                  |                   |                  |
| Hospital                  |                   |                  |                   |                  |                   |                  |                   |                  |
| Hospice                   |                   |                  |                   |                  |                   |                  |                   |                  |

e) Further treatment

|                                             | Week 1            |                  | Week 4            |                  | Week 8            |                  | Week 12           |                  |
|---------------------------------------------|-------------------|------------------|-------------------|------------------|-------------------|------------------|-------------------|------------------|
|                                             | 20 Gy/5 fr<br>N=? | 8 Gy/1 fr<br>N=? |
|                                             | % (n)             |                  |                   |                  |                   |                  |                   |                  |
| Supportive care for SCC                     |                   |                  |                   |                  |                   |                  |                   |                  |
| <u>Evaluable patients</u>                   |                   |                  |                   |                  |                   |                  |                   |                  |
| Corticosteroids                             |                   |                  |                   |                  |                   |                  |                   |                  |
| Analgesics                                  |                   |                  |                   |                  |                   |                  |                   |                  |
| Anti-emetics                                |                   |                  |                   |                  |                   |                  |                   |                  |
| Physiotherapy                               |                   |                  |                   |                  |                   |                  |                   |                  |
| Retreatment for SCC                         |                   |                  |                   |                  |                   |                  |                   |                  |
| <u>Evaluable patients</u>                   |                   |                  |                   |                  |                   |                  |                   |                  |
| Surgery                                     |                   |                  |                   |                  |                   |                  |                   |                  |
| Chemotherapy                                |                   |                  |                   |                  |                   |                  |                   |                  |
| Radiotherapy                                |                   |                  |                   |                  |                   |                  |                   |                  |
| Treatment for primary or metastatic disease |                   |                  |                   |                  |                   |                  |                   |                  |
| <u>Evaluable patients</u>                   |                   |                  |                   |                  |                   |                  |                   |                  |
| Surgery                                     |                   |                  |                   |                  |                   |                  |                   |                  |
| Chemotherapy                                |                   |                  |                   |                  |                   |                  |                   |                  |
| Radiotherapy                                |                   |                  |                   |                  |                   |                  |                   |                  |

## 5. Adverse events

Present results for the feasibility part and phase III trial separately because safety data are collected differently in the two parts of the trial.

For each type of event, the table will show the number (%) of patients. One patient can appear in more than one row.

### a) Grade 3|4 adverse events for Phase III trial patients based on CTCAE v 4.0

| Adverse event                                     | Any time                     |                            |
|---------------------------------------------------|------------------------------|----------------------------|
|                                                   | 20 Gy/<br>5 fractions<br>N=? | 8 Gy/<br>1 fraction<br>N=? |
| Expected                                          |                              |                            |
| Anorexia or reduced appetite                      |                              |                            |
| Diarrhoea                                         |                              |                            |
| Nausea                                            |                              |                            |
| Dysphagia/Oesophagitis/discomfort on swallowing   |                              |                            |
| Mucositis in oesophagus, bladder, bowel or rectum |                              |                            |
| Erythema in the irradiated field                  |                              |                            |
| Fatigue                                           |                              |                            |
|                                                   |                              |                            |
| Other                                             |                              |                            |
| 1                                                 |                              |                            |
| 2                                                 |                              |                            |
| 3                                                 |                              |                            |
| etc                                               |                              |                            |
| Any of the above adverse events*                  |                              |                            |

\*Patients counted only once

### b) Similarly list grade 1|2 adverse events.

c) Grade 3|4 adverse events for the feasibility trial patients using RTOG acute toxicity scale

| Adverse event                       | Anytime                  |                        |
|-------------------------------------|--------------------------|------------------------|
|                                     | 20 Gy/5 fractions<br>N=? | 8 Gy/1 fraction<br>N=? |
| Skin                                |                          |                        |
| Pharynx and oesophagus              |                          |                        |
| Larynx                              |                          |                        |
| Lung                                |                          |                        |
| Upper GI                            |                          |                        |
| Lower GI including pelvis           |                          |                        |
| CNS                                 |                          |                        |
| Genitourinary                       |                          |                        |
| Other                               |                          |                        |
| 1                                   |                          |                        |
| 2                                   |                          |                        |
| etc                                 |                          |                        |
|                                     |                          |                        |
| <b>Any of the above toxicities*</b> |                          |                        |

\*Patients counted only once

d) Similarly list grade 1|2 adverse events.

e) List of Serious Adverse Events and SUSARs

## 6. Other analyses

Subgroup analyses will be provided for the following factors:

Radiotherapy centre  
Ambulatory status at randomisation  
Primary tumour type  
Extent of disease (spinal metastases or spinal and non-bony metastases)

The hazard ratio and 95% CI in each level of the factor would be obtained.

Provide a p-value from a test for interaction between the factor and the treatment allocation, in relation to the main outcome measure (eg interaction between ambulatory status and treatment group using overall survival). This could be done using multivariate Cox modelling (time-to-event data), logistic regression (binary data), or linear regression (continuous data).

If there are several subgroups, a forest plot could be provided. Add a dashed vertical line to indicate the no effect value (eg hazard ratio=1, or relative risk=1), and a solid line to indicate the overall treatment effect (eg hazard ratio from all patients), as in the following example.

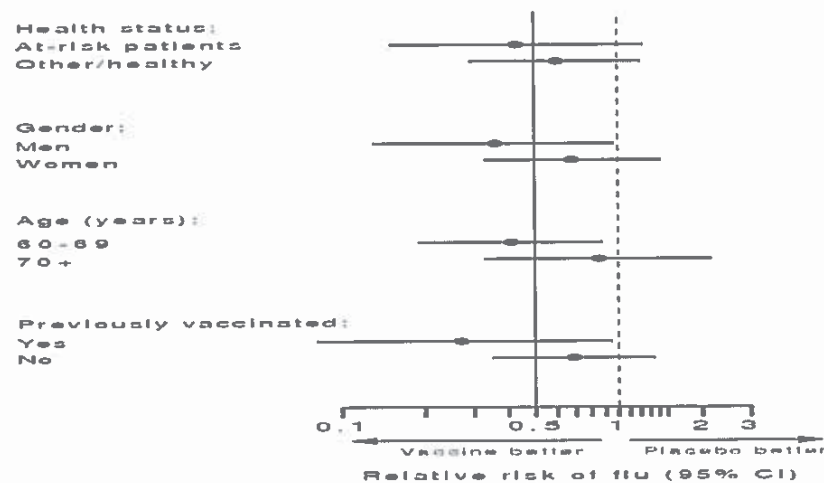

Multiple primary endpoints or multiple time points

Use 99% confidence intervals in the subgroup analysis

Multiple time points: use repeated measures analyses (eg mixed modelling), repeated ANOVA

| <b>Revision Chronology:</b> |                       |                                                 |                        |
|-----------------------------|-----------------------|-------------------------------------------------|------------------------|
| <b>Version Number</b>       | <b>Effective date</b> | <b>Reason for change and Summary of changes</b> | <b>Author</b>          |
| <b>01</b>                   | <b>13 Oct 2012</b>    |                                                 | <b>Latha Kadalayil</b> |
| <b>02</b>                   | <b>13 Jan 2013</b>    | <b>Added 90%CI as per design</b>                | <b>Andre Lopes</b>     |
|                             |                       |                                                 |                        |
