# Supplementary material
Source: PubMed Central journal article supplement (PMC6902166)
Supplement: jama-322-2084-s003.pdf [file jama-322-2084-s003.pdf]

## Supplementary Online Content

Hoskin PJ, Hopkins K, Misra V, et al. Effect of single-fraction vs multifraction radiotherapy on ambulatory status among patients with spinal canal compression from metastatic cancer

*JAMA*. doi:10.1001/jama.2019.17913

**eTable 1.** Other baseline characteristics by randomization group

**eTable 2.** Baseline characteristics by randomization group amongst patients evaluable for the primary endpoint

**eTable 3.** Patients with unknown outcome at 8 weeks' time frame

**eTable 4.** Sensitivity analyses for the primary endpoint: ambulatory status (AS) at week 8

**eTable 5.** Causes of death

**eTable 6.** Adverse events

**eTable 7.** Bladder and bowel function endpoints

**eTable 8.** Baseline characteristics by randomization group amongst patients evaluable for the primary endpoint who lived beyond 48 weeks

**eTable 9.** Ambulatory response at 8 weeks by location of SSC site

**eTable 10.** Quality of life at 4 and 8 weeks by ambulatory response in 20Gy/5f and 8Gy/1f

**eFigure 1.** Ambulatory status by randomization group

**eFigure 2.** Difference in ambulatory status at 8 weeks according to baseline characteristics (99% CIs are shown due to multiple analyses). The protocol pre-specified factors were ambulatory status, primary tumor type and extent of metastases

**eFigure 3.** Time to loss of ambulation

**eFigure 4.** Time to recovery of ambulation

**eFigure 5.** Pain scores in 8Gy/1f and in 20Gy/5f

**eFigure 6.** Overall survival (hazard ratio) according to baseline characteristics

**eFigure 7.** Deterioration-free survival

This supplementary material has been provided by the authors to give readers additional information about their work.

## Online Only Supplements

### Contents

|                                                                                                                                                                                                                                                        |          |
|--------------------------------------------------------------------------------------------------------------------------------------------------------------------------------------------------------------------------------------------------------|----------|
| <b>ONLINE ONLY SUPPLEMENTS</b> .....                                                                                                                                                                                                                   | <b>1</b> |
| eTable 1 - Other baseline characteristics by randomization group .....                                                                                                                                                                                 | 3        |
| eTable 2 - Baseline characteristics by randomization group amongst patients evaluable for the primary endpoint.....                                                                                                                                    | 4        |
| eTable 3 - Patients with unknown outcome at 8 weeks' time frame.....                                                                                                                                                                                   | 5        |
| eTable 4 – Sensitivity analyses for the primary endpoint: ambulatory status (AS) at week 8 .....                                                                                                                                                       | 6        |
| eTable 5 - Causes of death .....                                                                                                                                                                                                                       | 10       |
| eTable 6 - Adverse events.....                                                                                                                                                                                                                         | 11       |
| eTable 7 - Bladder and bowel function endpoints .....                                                                                                                                                                                                  | 12       |
| eTable 8 - Baseline characteristics by randomization group amongst patients evaluable for the primary endpoint who lived beyond 48 weeks .....                                                                                                         | 14       |
| eTable 9 - Ambulatory response at 8 weeks by location of SSC site.....                                                                                                                                                                                 | 15       |
| eTable 10 – Quality of life at 4 and 8 weeks by ambulatory response in 20Gy/5f and 8Gy/1f.....                                                                                                                                                         | 16       |
| eFigure 1 - Ambulatory status by randomization group.....                                                                                                                                                                                              | 18       |
| eFigure 2 – Difference in ambulatory status at 8 weeks according to baseline characteristics (99% CIs are shown due to multiple analyses). The protocol pre-specified factors were ambulatory status, primary tumor type and extent of metastases..... | 19       |
| eFigure 3 – Time to loss of ambulation.....                                                                                                                                                                                                            | 20       |
| eFigure 4 – Time to recovery of ambulation.....                                                                                                                                                                                                        | 20       |
| eFigure 5 - Pain scores in 8Gy/1f and in 20Gy/5f .....                                                                                                                                                                                                 | 21       |
| eFigure 6 - Overall survival (hazard ratio) according to baseline characteristics .....                                                                                                                                                                | 22       |
| eFigure 7 – Deterioration-free survival.....                                                                                                                                                                                                           | 23       |

eTable 1 - Other baseline characteristics by randomization group

| Baseline characteristics                                     | 8 Gy/1f<br>N=345 | 20 Gy/5f<br>N=341 |
|--------------------------------------------------------------|------------------|-------------------|
|                                                              |                  |                   |
| <b>Bladder function<sup>a</sup></b>                          |                  |                   |
| Normal                                                       | 246 (71%)        | 259 (76%)         |
| Abnormal                                                     | 96 (28%)         | 82 (24%)          |
| Not reported                                                 | 3 (1%)           | 0 (0%)            |
|                                                              |                  |                   |
| <b>Bowel function</b>                                        |                  |                   |
| Normal                                                       | 165 (48%)        | 175 (51%)         |
| Abnormal                                                     | 177 (51%)        | 166 (49%)         |
| Constipation                                                 | 141 (41%)        | 148 (43%)         |
| Diarrhoea/incontinence                                       | 29 (8%)          | 17 (5%)           |
| Constipation & Diarrhoea/incontinence                        | 7 (2%)           | 1 (<1%)           |
| Not reported                                                 | 3 (1%)           | 0 (0%)            |
|                                                              |                  |                   |
| <b>Duration of symptoms before SCC diagnosis<sup>b</sup></b> |                  |                   |
| <1 day                                                       | 13 (4%)          | 7 (2%)            |
| <1 week                                                      | 134 (39%)        | 126 (37%)         |
| <1 month                                                     | 102 (30%)        | 104 (31%)         |
| <3 months                                                    | 37 (11%)         | 41 (12%)          |
| >3 months                                                    | 18 (5%)          | 22 (6%)           |
| Not reported                                                 | 41 (12%)         | 41 (12%)          |
|                                                              |                  |                   |

a. Abnormal bladder function is defined as significant urinary incontinence or urinary retention requiring catheterisation

b. Time between onset of symptoms and SCC diagnosis. This data was not collected in the feasibility part of the study.

eTable 2 - Baseline characteristics by randomization group amongst patients evaluable for the primary endpoint

| Baseline characteristics                                   | 8 Gy/1f       | 20 Gy/5f      | p    |
|------------------------------------------------------------|---------------|---------------|------|
|                                                            | N=166         | N=176         |      |
| <b>Age, years</b>                                          |               |               |      |
| Median (range)                                             | 71 (44 to 91) | 70 (40 to 95) | 0.43 |
| <b>Sex</b>                                                 |               |               |      |
| Male                                                       | 125 (75%)     | 123 (70%)     | 0.26 |
| <b>Site of primary cancer</b>                              |               |               |      |
| Prostate                                                   | 91 (55%)      | 91 (52%)      |      |
| Lung                                                       | 15 (9%)       | 25 (14%)      |      |
| Breast                                                     | 22 (13%)      | 24 (14%)      |      |
| GI                                                         | 14 (8%)       | 15 (9%)       |      |
| Renal                                                      | 4 (2%)        | 6 (3%)        |      |
| Skin                                                       | 4 (2%)        | 3 (2%)        |      |
| Bladder                                                    | 3 (2%)        | 1 (1%)        |      |
| Gynae, head & neck, sarcoma, unspecified                   | 13 (8%)       | 11 (6%)       | 0.83 |
| <b>Extent of metastases</b>                                |               |               |      |
| Nonskeletal mets present                                   | 74 (45%)      | 66 (38%)      | 0.18 |
| <b>Number of SCC sites</b>                                 |               |               |      |
| Single                                                     | 151 (91%)     | 165 (94%)     |      |
| Multiple                                                   | 15 (9%)       | 11 (6%)       | 0.33 |
| <b>Site of spinal cord compression (SCC)</b>               |               |               |      |
| Cervical vertebrae                                         | 5 (3%)        | 7 (4%)        |      |
| Cervical and thoracic                                      | 2 (1%)        | 4 (2%)        |      |
| Thoracic                                                   | 101 (61%)     | 113 (64%)     |      |
| Thoracic and lumbar                                        | 11 (7%)       | 9 (5%)        |      |
| Lumbar                                                     | 41 (25%)      | 34 (19%)      |      |
| Lumbar and sacrum                                          | 1 (1%)        | 2 (1%)        |      |
| Sacrum (S1 and S2)                                         | 5 (3%)        | 5 (3%)        |      |
| Not reported                                               | 0 (0%)        | 2 (1%)        | 0.71 |
| <b>WHO performance status</b>                              |               |               |      |
| 0 & 1                                                      | 65 (39%)      | 65 (37%)      |      |
| 2                                                          | 47 (28%)      | 46 (26%)      |      |
| 3                                                          | 40 (24%)      | 51 (29%)      |      |
| 4                                                          | 13 (8%)       | 12 (7%)       |      |
| Not reported                                               | 1 (1%)        | 2 (1%)        | 0.85 |
| <b>Ambulatory status</b>                                   |               |               |      |
| Grade 1: Ambulatory without walking aids                   | 49 (30%)      | 49 (28%)      |      |
| Grade 2: Ambulatory with walking aids                      | 83 (50%)      | 83 (47%)      |      |
| Grade 3: Unable to ambulate                                | 26 (16%)      | 33 (19%)      |      |
| Grade 4: No motor power                                    | 8 (5%)        | 11 (6%)       | 0.80 |
| <b>Treatment at baseline</b>                               |               |               |      |
| Chemotherapy only ( $\leq$ 4 weeks prior randomization)    | 6 (4%)        | 17 (10%)      |      |
| Hormone therapy only ( $\leq$ 4 weeks prior randomization) | 53 (32%)      | 59 (34%)      |      |
| Radiotherapy only ( $\leq$ 6 months prior randomization)   | 13 (8%)       | 13 (7%)       |      |
| Combination of the above                                   | 22 (13%)      | 14 (8%)       |      |
| None/Not reported                                          | 72 (43%)      | 73 (41%)      | 0.19 |

Note: P value for age derived from quantile regression which compares medians; all the other p-values are derived from chi-square test

eTable 3 - Patients with unknown outcome at 8 weeks' time frame

|                                                                                                                                                                                                                                      | Treatment           |                    |
|--------------------------------------------------------------------------------------------------------------------------------------------------------------------------------------------------------------------------------------|---------------------|--------------------|
|                                                                                                                                                                                                                                      | 8 Gy/1F             | 20 Gy/5F           |
|                                                                                                                                                                                                                                      | N=345               | N=341              |
|                                                                                                                                                                                                                                      | N (%)               |                    |
| <b>Unknown outcome at 8 weeks' timeframe<sup>a</sup></b>                                                                                                                                                                             | <b>179 (51.88%)</b> | <b>165 (48.4%)</b> |
| Died before week 7                                                                                                                                                                                                                   | 119 (66.5%)         | 106 (64.2%)        |
| Died between week 7 and week 8                                                                                                                                                                                                       | 8 (4.5%)            | 17 (10.3%)         |
| Died between week 8 and week 9                                                                                                                                                                                                       | 3 (1.7%)            | 2 (1.2%)           |
| Lost to follow-up before week 7                                                                                                                                                                                                      | 3 (1.7%)            | 5 (3.0%)           |
| Lost to follow-up between week 7 and week 8                                                                                                                                                                                          | 0 (0%)              | 0 (0%)             |
| Lost to follow-up between week 8 and week 9                                                                                                                                                                                          | 0 (0%)              | 1 (0.6%)           |
| Alive beyond week 9 (all with baseline assessment):                                                                                                                                                                                  |                     |                    |
| Baseline only                                                                                                                                                                                                                        | 4 (2.2%)            | 0 (0%)             |
| Assessment(s) only before 8 week target <sup>b</sup>                                                                                                                                                                                 | 9 (5.0%)            | 9 (5.5%)           |
| Assessment(s) only after 8 weeks' target <sup>b</sup>                                                                                                                                                                                | 1 (0.6%)            | 0 (0%)             |
| Assessments only before and only after the 8 weeks' target <sup>b</sup>                                                                                                                                                              | 32 (17.9%)          | 25 (15.2%)         |
|                                                                                                                                                                                                                                      |                     |                    |
| <sup>a</sup> . 8 weeks' time window is from $\geq 7$ weeks to $<9$ weeks, i.e., $\geq 49$ days and $<63$ days<br><sup>b</sup> . These patients had assessments outside the protocol specified time window for the 8 weeks assessment |                     |                    |

eTable 4 – Sensitivity analyses for the primary endpoint: ambulatory status (AS) at week 8

| Sensitivity analyses                                                                                                                                                                                                                                                                                                                                                                                                                                                                                  | Intention to treat population |             |                 | Per protocol population |             |                 |
|-------------------------------------------------------------------------------------------------------------------------------------------------------------------------------------------------------------------------------------------------------------------------------------------------------------------------------------------------------------------------------------------------------------------------------------------------------------------------------------------------------|-------------------------------|-------------|-----------------|-------------------------|-------------|-----------------|
|                                                                                                                                                                                                                                                                                                                                                                                                                                                                                                       | 8 Gy/1f                       | 20 Gy/5f    | Risk difference | 8 Gy/1f                 | 20 Gy/5f    | Risk difference |
|                                                                                                                                                                                                                                                                                                                                                                                                                                                                                                       | N (%)                         | N (%)       | (90% CI)        | N (%)                   | N (%)       | (90% CI)        |
|                                                                                                                                                                                                                                                                                                                                                                                                                                                                                                       |                               |             | 8 Gy-20Gy       |                         |             | 8 Gy-20Gy       |
| <b>Main analysis (Table 2 of the paper)</b>                                                                                                                                                                                                                                                                                                                                                                                                                                                           |                               |             |                 |                         |             |                 |
| Main analysis by intention to treat and per protocol, where the 8-week assessment is defined as any occurring between 49 and 62 days inclusive post-randomization (i.e. at weeks 7 or 8)                                                                                                                                                                                                                                                                                                              |                               |             |                 |                         |             |                 |
| Evaluables                                                                                                                                                                                                                                                                                                                                                                                                                                                                                            | 166                           | 176         | <b>-3.5%</b>    | 164                     | 173         | <b>-3.9%</b>    |
| Positive response                                                                                                                                                                                                                                                                                                                                                                                                                                                                                     | 115 (69.3%)                   | 128 (72.7%) | (-11.5 to 4.6)  | 114 (69.5%)             | 127 (73.4%) | (-12.0 to 4.2)  |
| <b>Analysis 1a (primary analysis adjusted for the randomization stratification factors: baseline ambulatory status, primary tumour and extension of metastases)</b>                                                                                                                                                                                                                                                                                                                                   |                               |             |                 |                         |             |                 |
| <ul style="list-style-type: none"> <li>Logistic regression was implemented with the outcome being a positive response at 8 weeks, and explanatory variables being treatment and minimisation stratification factors.</li> <li>The adjusted probabilities of positive response by treatment, the difference in these probabilities and estimated 90%CI for the difference were derived from the logistic regression.</li> </ul>                                                                        |                               |             |                 |                         |             |                 |
| Evaluables                                                                                                                                                                                                                                                                                                                                                                                                                                                                                            | 166                           | 176         | <b>-4.8%</b>    | 164                     | 173         | <b>-5.3%</b>    |
| Positive response                                                                                                                                                                                                                                                                                                                                                                                                                                                                                     | 68.5%                         | 73.3%       | (-11.8 to 2.2%) | 68.7%                   | 74.0%       | (-12.3% to 1.7) |
| <b>Analysis 1b (primary analysis using clustered sandwich estimator)</b>                                                                                                                                                                                                                                                                                                                                                                                                                              |                               |             |                 |                         |             |                 |
| <ul style="list-style-type: none"> <li>Logistic regression was implemented with standard errors adjusted for hospital (clustered sandwich estimator which allows for intragroup correlation) and fit with the outcome being a positive response at 8 weeks and explanatory variable being treatment.</li> <li>The probabilities of positive response by treatment, the difference in these probabilities and estimated 90%CI for the difference were derived from the logistic regression.</li> </ul> |                               |             |                 |                         |             |                 |
| Evaluables                                                                                                                                                                                                                                                                                                                                                                                                                                                                                            | 166                           | 176         | <b>-3.5%</b>    | 164                     | 173         | <b>-3.9%</b>    |
| Positive response                                                                                                                                                                                                                                                                                                                                                                                                                                                                                     | 69.3%                         | 72.7%       | (-10.3 to 3.4%) | 69.5%                   | 73.4%       | (-11.5% to 3.7) |
| <b>Analysis 2 (handling patients without the 8-week assessment)</b>                                                                                                                                                                                                                                                                                                                                                                                                                                   |                               |             |                 |                         |             |                 |
| 40 patients were assessed between 63 and 69 days post-randomization (i.e. up to 1 week after the 62-day limit) so were not included in the main analysis above. The sensitivity analysis includes these patients. The analysis is therefore based on patients with an AS assessment between 49 and 69 days post-randomization.                                                                                                                                                                        |                               |             |                 |                         |             |                 |
| Evaluables                                                                                                                                                                                                                                                                                                                                                                                                                                                                                            | 191                           | 191         | <b>-4.2</b>     | 188                     | 188         | <b>-4.8</b>     |
| Positive response                                                                                                                                                                                                                                                                                                                                                                                                                                                                                     | 131 (68.6%)                   | 139 (72.8%) | (-11.8 to 3.5)  | 129 (68.6%)             | 138 (73.4%) | (-12.5 to 2.9)  |
| <b>Analysis 3 (handling patients without the 8-week assessment)</b>                                                                                                                                                                                                                                                                                                                                                                                                                                   |                               |             |                 |                         |             |                 |
| 57 patients were assessed at 4 weeks and also after week 8 (i.e. after 62 days post-randomization). However, 51 of these had the same ambulatory response at both time points, so it was assumed that their 8-week assessment would be the same also. The other 6 patients were not included here.                                                                                                                                                                                                    |                               |             |                 |                         |             |                 |
| Evaluables                                                                                                                                                                                                                                                                                                                                                                                                                                                                                            | 195                           | 198         | <b>-4.0</b>     | 192                     | 195         | <b>-4.6</b>     |
| Positive response                                                                                                                                                                                                                                                                                                                                                                                                                                                                                     | 134 (68.7%)                   | 144 (72.7%) | (-11.6 to 3.5)  | 132 (68.8%)             | 143 (73.3%) | (-12.2 to 3.0)  |
| <b>Analysis 4 (imputation of missing data)</b>                                                                                                                                                                                                                                                                                                                                                                                                                                                        |                               |             |                 |                         |             |                 |
| This analysis assumes that the following categories of patients had a negative response (N=89):                                                                                                                                                                                                                                                                                                                                                                                                       |                               |             |                 |                         |             |                 |
| <ul style="list-style-type: none"> <li>All patients alive beyond week 9 with no ambulatory assessment at week 8 time window (49-62 days post-randomization)</li> </ul>                                                                                                                                                                                                                                                                                                                                |                               |             |                 |                         |             |                 |

- All patients lost to follow-up before week 9 and therefore with no ambulatory assessment at week 8 time window

|                   |                |                |                |  |                |                |                |
|-------------------|----------------|----------------|----------------|--|----------------|----------------|----------------|
| Evaluables        | 215            | 216            | <b>-5.8</b>    |  | 211            | 213            | <b>-5.6</b>    |
| Positive response | 115<br>(53.5%) | 128<br>(59.3%) | (-13.6 to 2.1) |  | 114<br>(54.0%) | 127<br>(59.6%) | (-13.5 to 2.3) |

**Analysis 5 (imputation of missing data)**  
 This analysis assumes that the following categories of patients had a positive response (N=89):

- All patients alive beyond week 9 with no ambulatory assessment at week 8 (49-62 days post-randomization)
- All patients lost to follow-up before week 9 and therefore with no ambulatory assessment at week 8 time window

|                   |                |                |               |  |                |                |               |
|-------------------|----------------|----------------|---------------|--|----------------|----------------|---------------|
| Evaluables        | 215            | 216            | <b>-1.5</b>   |  | 211            | 213            | <b>-2.1</b>   |
| Positive response | 164<br>(76.3%) | 168<br>(77.8%) | (-8.2 to 5.2) |  | 161<br>(76.3%) | 167<br>(78.4%) | (-8.8 to 4.6) |

**Analysis 6 (imputation of missing data)**  
 This analysis assumes that the following categories of patients had the same positive response rate at week 8 as the rate observed in the intention-to-treat analysis in the 8Gy/1f group (N=89):

- All patients alive beyond week 9 (≥63 days post-randomization) with no ambulatory assessment at week 8
- All patients lost to follow-up before week 9 with no ambulatory assessment at week 8 time window

|                   |                |                |                |  |                |                |                |
|-------------------|----------------|----------------|----------------|--|----------------|----------------|----------------|
| Evaluables        | 215            | 216            | <b>-2.9</b>    |  | 211            | 213            | <b>-3.6</b>    |
| Positive response | 149<br>(69.3%) | 156<br>(72.2%) | (-10.1 to 4.3) |  | 146<br>(69.2%) | 155<br>(72.8%) | (-10.8 to 3.7) |

**Analysis 7 (imputation of missing data)**  
 This analysis assumes that the following categories of patients had the same positive response rate at week 8 as the rate observed in the intention-to-treat analysis in the **20Gy/5f** group (N=89):

- All patients alive beyond week 9 with no ambulatory assessment at week 8
- All patients lost to follow-up before week 9 with no ambulatory assessment at week 8

|                   |                |                |               |  |                |                |                |
|-------------------|----------------|----------------|---------------|--|----------------|----------------|----------------|
| Evaluables        | 215            | 216            | <b>-2.5</b>   |  | 211            | 213            | <b>-3.0</b>    |
| Positive response | 151<br>(70.2%) | 157<br>(72.7%) | (-9.6 to 4.7) |  | 148<br>(70.1%) | 156<br>(73.2%) | (-10.3 to 4.1) |

**Analysis 8 (imputation of missing data)**  
 This analysis considers the following:

- If a patient has the same ambulatory assessment before and after the week 8 time period and the patient does not have an assessment done during week 8 (as defined), it is assumed that the week 8 assessment is the same as the response the patient obtained before and after the week 8 time period (N=51).
- All the patients with no ambulatory assessment at week 8 (a) alive beyond week 9 and (b) lost to follow-up before week 9 are assumed to have the same rate of positive response as the ones with known ambulatory status at the week 8 time period (N=38)

|                   |                |                |                |  |                |                |                |
|-------------------|----------------|----------------|----------------|--|----------------|----------------|----------------|
| Evaluables        | 215            | 216            | <b>-3.9</b>    |  | 211            | 213            | <b>-4.1</b>    |
| Positive response | 148<br>(68.8%) | 157<br>(72.7%) | (-11.1 to 3.4) |  | 146<br>(69.2%) | 156<br>(73.2%) | (-11.3 to 3.2) |

**Analysis 9 (Multiple imputation using chained equations - outcome imputed as a binary variable)**  
 The data for the following category of patients were imputed using multiple imputation (N=89 for ITT and N=87 for PP):

- All patients alive beyond week 9 with no ambulatory assessment at week 8 (49-62 days post-randomization)
- All patients lost to follow-up before week 9 and therefore had no ambulatory assessment at week 8.

The multiple imputation was done considering the following:

- The auxiliary variables used were: age, sex, primary tumour, ambulatory status at randomization, the extent of metastases, number of SSC sites, site of spinal cord compression, recruiting country, hospital site and treatment group.
- 50 imputations were used in the procedure using a random seed.
- A direct multiple imputation of the binary outcome response at 8 weeks (AS response at 8 weeks as positive or negative) was done using logistic regression.
- An unadjusted logistic regression model was estimated using multiple imputations in order to evaluate the association between treatment group and response at 8 weeks.
- The predicted odds ratios and 90%CI from logistic regression using multiple imputations were converted into the difference in predicted probabilities and estimated 90%CI.

|                   |       |       |                  |  |       |       |                  |
|-------------------|-------|-------|------------------|--|-------|-------|------------------|
| Evaluables        | 215   | 216   | <b>-4.4%</b>     |  | 211   | 213   | <b>-5.0%</b>     |
| Positive response | 65.3% | 69.7% | (-12.5% to 3.6%) |  | 65.1% | 70.2% | (-13.4% to 3.3%) |
|                   |       |       |                  |  |       |       |                  |

**Analysis 10 (Multiple imputation using chained equations - outcome imputed directly as an ordinal variable)**

The data for the following categories of patients were imputed using multiple imputation (N=89 for ITT and N=87 for PP):

- All patients alive beyond week 9 with no ambulatory assessment at week 8 (49-62 days post-randomization)
- All patients lost to follow-up before week 9 and therefore had no ambulatory assessment at week 8 time window

The multiple imputation was done considering the following:

- The auxiliary variables used were: age, sex, primary tumour, ambulatory status at randomization, the extent of metastases, number of SSC sites, site of spinal cord compression, recruiting country, hospital site and treatment group.
- 50 imputations were used in the procedure using a random seed.
- Multiple imputation of the ordinal outcome at 8 weeks (AS 1,2,3,4) was carried out using an ordered logistic regression imputation method. Once the ordinal outcome was imputed, it was then transformed into a binary variable (positive/negative response) defined in the protocol.
- An unadjusted logistic regression model was estimated using multiple imputations to evaluate the association between treatment group and response at 8 weeks.
- The predicted odds ratios and 90%CI from logistic regression using multiple imputations were converted into difference in predicted probabilities and estimated 90%CI to be in line with the primary analysis results.

|                   |       |       |                  |  |       |       |                  |
|-------------------|-------|-------|------------------|--|-------|-------|------------------|
| Evaluables        | 215   | 216   | <b>-3.4%</b>     |  | 211   | 213   | <b>-4.4%</b>     |
| Positive response | 65.5% | 68.9% | (-11.7% to 4.9%) |  | 65.9% | 70.3% | (-12.5% to 3.7%) |
|                   |       |       |                  |  |       |       |                  |

Analyses 4 to 10 are based on the 8 week assessment defined as between 49 and 62 days inclusive post-randomization.

The population used for the intention to treat analysis includes all eligible randomised patients who did not die by the week 8 timepoint. The population used for the per protocol analysis includes all eligible randomised patients who received treatment as per protocol who did not die by the week 8 timepoint





*eTable 5 - Causes of death*

| Cause of death                                                                                                                                                                                                                                                                                                                                         | Deaths    |           |
|--------------------------------------------------------------------------------------------------------------------------------------------------------------------------------------------------------------------------------------------------------------------------------------------------------------------------------------------------------|-----------|-----------|
|                                                                                                                                                                                                                                                                                                                                                        | N=529     |           |
|                                                                                                                                                                                                                                                                                                                                                        | 8Gy/1f    | 20Gy/5f   |
|                                                                                                                                                                                                                                                                                                                                                        | N (%)     | N (%)     |
|                                                                                                                                                                                                                                                                                                                                                        | N=266     | N=263     |
| Progressive Cancer                                                                                                                                                                                                                                                                                                                                     | 226 (85%) | 220 (83%) |
| Other:                                                                                                                                                                                                                                                                                                                                                 |           |           |
| Infections and infestations                                                                                                                                                                                                                                                                                                                            | 4 (2%)    | 4 (2%)    |
| Cardiovascular disorders                                                                                                                                                                                                                                                                                                                               | 1 (<1%)   | 5 (2%)    |
| Other <sup>a</sup>                                                                                                                                                                                                                                                                                                                                     | 5 (2%)    | 6 (2%)    |
|                                                                                                                                                                                                                                                                                                                                                        |           |           |
| Uncertain/Not Known                                                                                                                                                                                                                                                                                                                                    | 30 (11%)  | 28 (11%)  |
| <sup>a</sup> . Other:<br>8Gy1f: (1) disease progression; (2) Injury, poisoning and procedural complications; (1) metabolism and nutrition disorder; (1) nervous system disorder<br>20Gy5f: (3) disease progression; (1) Injury, poisoning and procedural complications; (1) General disorders and administration site conditions; (1) Secondary Cancer |           |           |

eTable 6 - Adverse events

| Adverse events                    | Grade 1 & 2 |             | Grade 3 & 4 <sup>a</sup> |            |
|-----------------------------------|-------------|-------------|--------------------------|------------|
|                                   | N=686       |             | N=686                    |            |
|                                   | 8Gy/1f      | 20Gy/5f     | 8Gy/1f                   | 20Gy/5f    |
|                                   | N=345       | N=341       | N=345                    | N=341      |
| Skin                              |             |             |                          |            |
| Radiation reaction                | 40 (11.6%)  | 66 (19.4%)  |                          | 1 (0.3%)   |
| Other                             | 9 (2.6%)    | 3 (0.9%)    |                          | 2 (0.6%)   |
| Musculoskeletal                   |             |             |                          |            |
| Pain                              | 35 (10.1%)  | 33 (9.7%)   | 18 (5.2%)                | 9 (2.6%)   |
| Edema                             | 7 (2.0%)    | 6 (1.8%)    |                          |            |
| Muscle weakness                   | 5 (1.4%)    | 5 (1.5%)    | 3 (0.9%)                 | 4 (1.2%)   |
| Other                             | 2 (0.6%)    |             |                          | 1 (0.3%)   |
| Gastrointestinal                  |             |             |                          |            |
| Anorexia                          | 101 (29.3%) | 101 (29.6%) | 6 (1.7%)                 | 4 (1.2%)   |
| Nausea                            | 65 (18.8%)  | 63 (18.5%)  | 4 (1.2%)                 | 1 (0.3%)   |
| Diarrhoea                         | 49 (14.2%)  | 36 (10.6%)  | 2 (0.6%)                 | 6 (1.8%)   |
| Dysphagia                         | 23 (6.7%)   | 32 (9.4%)   | 3 (0.9%)                 |            |
| Constipation                      | 22 (6.4%)   | 12 (3.5%)   | 1 (0.3%)                 |            |
| Sore throat                       | 13 (3.8%)   | 33 (9.7%)   |                          |            |
| Vomiting                          | 3 (0.9%)    | 8 (2.3%)    | 2 (0.6%)                 |            |
| Abdominal pain                    |             | 4 (1.2%)    | 2 (0.6%)                 | 1 (0.3%)   |
| Abdominal distension              | 1 (0.3%)    |             | 2 (0.6%)                 |            |
| Oral pain                         | 3 (0.9%)    | 2 (0.6%)    |                          |            |
| Other                             | 19 (5.5%)   | 25 (7.3%)   |                          | 1 (0.3%)   |
| CNS                               |             |             |                          |            |
| Fatigue                           | 168 (48.7%) | 189 (55.4%) | 28 (8.1%)                | 33 (9.7%)  |
| Headache                          | 3 (0.9%)    |             |                          |            |
| Other                             | 12 (3.5%)   | 14 (4.1%)   | 9 (2.6%)                 | 5 (1.5%)   |
| Blood and lymphatic               |             |             |                          |            |
| Anaemia                           | 1 (0.3%)    | 1 (0.3%)    |                          | 2 (0.6%)   |
| Febrile neutropenia               |             |             |                          | 1 (0.3%)   |
| Other                             | 1 (0.3%)    | 1 (0.3%)    | 1 (0.3%)                 | 2 (0.6%)   |
| Other                             |             |             |                          |            |
| Respiratory                       | 11 (3.2%)   | 16 (4.7%)   | 12 (3.5%)                | 13 (3.8%)  |
| Urinary                           | 10 (2.9%)   | 10 (2.9%)   | 4 (1.2%)                 | 1 (0.3%)   |
| Infective                         | 6 (1.7%)    | 9 (2.6%)    | 3 (0.9%)                 | 2 (0.6%)   |
| Psychiatric                       | 9 (2.6%)    | 5 (1.5%)    | 1 (0.3%)                 | 4 (1.2%)   |
| Metabolic                         | 1 (0.3%)    |             | 1 (0.3%)                 | 3 (0.9%)   |
| Renal                             | 1 (0.3%)    | 1 (0.3%)    | 1 (0.3%)                 | 1 (0.3%)   |
| Thromboembolic and other vascular | 1 (0.3%)    | 2 (0.6%)    | 1 (0.3%)                 | 1 (0.3%)   |
| Other                             | 4 (1.2%)    | 4 (1.2%)    | 7 (2.0%)                 | 3 (0.9%)   |
| Any adverse event                 | 179 (51.9%) | 194 (56.9%) | 71 (20.6%)               | 70 (20.5%) |

<sup>a</sup> Three patients had grade 5 adverse event in 8Gy/1f Group: (1) Intracranial haemorrhage (Nervous system disorders); (1) Supraventricular tachycardia (Cardiac disorders) and Thromboembolic event (Vascular disorders); (1) Sudden death NOS (General disorders and administration site conditions)  
 Five patients had grade 5 adverse event in 20Gy/5f Group: (1) Myocardial infarction (Cardiac disorders); (1) Upper respiratory infection (Infections and infestations) and Other injury, poisoning and procedural complications: Hospital-acquired upper respiratory tract infection (Injury, poisoning and procedural complications); (1) Stridor (Respiratory, thoracic and mediastinal disorders); (1) Cardiac arrest (Cardiac disorders); (1) Respiratory failure (Respiratory, thoracic and mediastinal disorders)  
 All of the above 8 deaths were unrelated to radiotherapy

Note: Each row represents the number of patients that experienced a particular type of adverse event. On each row patients are counted only once based on the worst grade experienced for each adverse event.

eTable 7 - Bladder and bowel function endpoints

| Assessment                                                                                         | Abnormal bladder function |               |                      |      | Abnormal bowel function |               |                     |      |
|----------------------------------------------------------------------------------------------------|---------------------------|---------------|----------------------|------|-------------------------|---------------|---------------------|------|
|                                                                                                    | 8Gy/1f                    | 20Gy/5f       | Odds ratios (95%CI)  | p    | 8Gy/1f                  | 20Gy/5f       | Odds ratios (95%CI) | p    |
|                                                                                                    | Events/N (%)              | Events/N (%)  |                      |      | Events/N (%)            | Events/N (%)  |                     |      |
| <b>Overall</b>                                                                                     |                           |               |                      |      |                         |               |                     |      |
| <b>Baseline</b>                                                                                    | 96/342 (28%)              | 82/341 (24%)  | 1.23 (0.88 to 1.74)  | 0.23 | 177/342 (52%)           | 166/341 (49%) | 1.13 (0.84 to 1.53) | 0.42 |
| <b>Week 1</b>                                                                                      | 93/294 (32%)              | 76/300 (25%)  | 1.36 (0.95 to 1.95)  | 0.09 | 131/293 (45%)           | 132/300 (44%) | 1.03 (0.74 to 1.42) | 0.86 |
|                                                                                                    | Adjusted <sup>a</sup>     |               | 1.15 (0.67 to 1.99)  | 0.61 |                         |               |                     |      |
| <b>Week 4</b>                                                                                      | 66/209 (32%)              | 53/223 (24%)  | 1.48 (0.97 to 2.26)  | 0.07 | 82/209 (39%)            | 79/223 (35%)  | 1.18 (0.80 to 1.74) | 0.41 |
|                                                                                                    | Adjusted <sup>a</sup>     |               | 1.61 (0.92 to 2.82)  | 0.09 |                         |               |                     |      |
| <b>Week 8</b>                                                                                      | 47/151 (31%)              | 34/166 (20%)  | 1.75 (1.05 to 2.92)  | 0.03 | 59/151 (39%)            | 61/166 (37%)  | 1.10 (0.70 to 1.74) | 0.67 |
|                                                                                                    | Adjusted <sup>a</sup>     |               | 1.78 (0.93 to 3.39)  | 0.08 |                         |               |                     |      |
| <b>Week 12</b>                                                                                     | 41/139 (30%)              | 35/154 (23%)  | 1.42 (0.84 to 2.40)  | 0.19 | 53/140 (38%)            | 55/155 (35%)  | 1.11 (0.69 to 1.78) | 0.67 |
|                                                                                                    | Adjusted <sup>a</sup>     |               | 1.64 (0.86 to 3.14)  | 0.14 |                         |               |                     |      |
| <b>Any time<sup>b</sup></b>                                                                        | 132/316 (42%)             | 111/322 (34%) | 1.36 (0.99 to 1.88)  | 0.06 | 203/315 (64%)           | 204/322 (63%) | 1.05 (0.76 to 1.45) | 0.78 |
|                                                                                                    | Adjusted <sup>a</sup>     |               | 1.31 (0.87 to 1.97)  | 0.20 |                         |               |                     |      |
| <b>Only location of SSC site within C1 to T12 (treatment exclusively to the spinal cord)</b>       |                           |               |                      |      |                         |               |                     |      |
| <b>Week 8</b>                                                                                      | 29/97 (30%)               | 29/117 (25%)  | 1.29 (0.70 to 2.37)  | 0.40 | 41/97 (42%)             | 46/117 (39%)  | 1.13 (0.65 to 1.95) | 0.66 |
| <b>Any time</b>                                                                                    | 92/219 (42%)              | 85/236 (36%)  | 1.29 (0.88 to 1.88)  | 0.19 | 143/219 (65%)           | 148/236 (63%) | 1.12 (0.76 to 1.64) | 0.57 |
| <b>Only location of SSC site within L1 to S2 (treatment to the cauda equina)</b>                   |                           |               |                      |      |                         |               |                     |      |
| <b>Week 8</b>                                                                                      | 15/44 (34%)               | 4/39 (10%)    | 4.53 (1.35 to 15.14) | 0.14 | 14/44 (32%)             | 11/39 (28%)   | 1.19 (0.46 to 3.05) | 0.72 |
| <b>Any time</b>                                                                                    | 34/81 (42%)               | 21/70 (30%)   | 1.69 (0.86 to 3.32)  | 0.13 | 51/80 (64%)             | 47/70 (67%)   | 0.86 (0.44 to 1.69) | 0.66 |
| <b>Only location of SSC site within T6 to L5 (treatment across both the cord and cauda equina)</b> |                           |               |                      |      |                         |               |                     |      |
| <b>Week 8</b>                                                                                      | 3/10 (30%)                | 1/8 (13%)     | 3.00 (0.25 to 36.32) | 0.39 | 4/10 (40%)              | 3/8 (38%)     | 1.11 (0.16 to 7.51) | 0.91 |
| <b>Any time</b>                                                                                    | 6/16 (38%)                | 5/14 (36%)    | 1.08 (0.24 to 4.79)  | 0.92 | 9/16 (56%)              | 7/14 (50%)    | 1.29 (0.30 to 5.43) | 0.66 |

|  |  |  |  |  |  |  |  |  |   |
|--|--|--|--|--|--|--|--|--|---|
|  |  |  |  |  |  |  |  |  | 7 |
|  |  |  |  |  |  |  |  |  | 3 |

Note: Logistic regression was done comparing 8Gy/1f versus 20Gy/5f. The analysis was based only on the number of patients with assessment (evaluable patients)

- a. Adjusted for bladder function at baseline, sex, age, baseline AS, primary tumour, number of SSC sites, the extent of metastases at baseline and extent of metastases
- b. Includes assessments at all time points except baseline assessment

eTable 8 - Baseline characteristics by randomization group amongst patients evaluable for the primary endpoint who lived beyond 48 weeks

| Baseline characteristics                                   | 8 Gy/1f       | 20 Gy/5f      | p     |
|------------------------------------------------------------|---------------|---------------|-------|
|                                                            | N=39          | N=38          |       |
| <b>Age, years</b>                                          |               |               |       |
| Median (range)                                             | 68 (51 to 86) | 71 (40 to 91) | 0.4   |
| <b>Sex</b>                                                 |               |               |       |
| Female                                                     | 10 (26%)      | 6 (16%)       |       |
| Male                                                       | 29 (74%)      | 32 (84%)      | 0.4   |
| <b>Site of primary cancer</b>                              |               |               |       |
| Prostate                                                   | 26 (67%)      | 30 (79%)      |       |
| Lung                                                       | 1 (3%)        | 0 (0%)        |       |
| Breast                                                     | 7 (18%)       | 3 (8%)        |       |
| GI                                                         | 1 (3%)        | 1 (3%)        |       |
| Renal                                                      | 1 (3%)        | 0 (0%)        |       |
| Skin                                                       | 0 (0%)        | 1 (3%)        |       |
| Bladder                                                    | 0 (0%)        | 1 (3%)        |       |
| Gynae, head & neck, sarcoma, unspecified                   | 3 (8%)        | 2 (5%)        | 0.59  |
| <b>Extent of metastases</b>                                |               |               |       |
| Nonskeletal mets absence                                   | 25 (64%)      | 29 (76%)      |       |
| Nonskeletal mets present                                   | 14 (36%)      | 9 (24%)       | 0.32  |
| <b>Number of SCC sites</b>                                 |               |               |       |
| Single                                                     | 37 (95%)      | 36 (95%)      |       |
| Multiple                                                   | 2 (5%)        | 2 (5%)        | >0.99 |
| <b>Site of spinal cord compression (SCC)</b>               |               |               |       |
| Cervical vertebrae                                         | 1 (3%)        | 1 (3%)        |       |
| Cervical and thoracic                                      | 1 (3%)        | 0 (0%)        |       |
| Thoracic                                                   | 22 (56%)      | 23 (61%)      |       |
| Thoracic and lumbar                                        | 3 (8%)        | 4 (11%)       |       |
| Lumbar                                                     | 10 (26%)      | 8 (21%)       |       |
| Lumbar and sacrum                                          | 1 (3%)        | 1 (3%)        |       |
| Sacrum (S1 and S2)                                         | 1 (3%)        | 1 (3%)        | 0.98  |
| <b>WHO performance status</b>                              |               |               |       |
| 0 & 1                                                      | 19 (49%)      | 18 (47%)      |       |
| 2                                                          | 11 (28%)      | 8 (21%)       |       |
| 3                                                          | 9 (23%)       | 9 (24%)       |       |
| 4                                                          | 0 (0%)        | 2 (5%)        |       |
| Not reported                                               | 0 (0%)        | 1 (3%)        | 0.59  |
| <b>Ambulatory status</b>                                   |               |               |       |
| Grade 1: Ambulatory without walking aids                   | 13 (33%)      | 13 (34%)      |       |
| Grade 2: Ambulatory with walking aids                      | 21 (54%)      | 15 (39%)      |       |
| Grade 3: Unable to ambulate                                | 4 (10%)       | 8 (21%)       |       |
| Grade 4: No motor power                                    | 1 (3%)        | 2 (5%)        | 0.48  |
| <b>Treatment at baseline</b>                               |               |               |       |
| Chemotherapy only ( $\leq$ 4 weeks prior randomization)    | 1 (3%)        | 1 (3%)        |       |
| Hormone therapy only ( $\leq$ 4 weeks prior randomization) | 16 (41%)      | 19 (50%)      |       |
| Radiotherapy only ( $\leq$ 6 months prior randomization)   | 0 (0%)        | 4 (11%)       |       |
| Combination of the above                                   | 6 (15%)       | 2 (5%)        |       |
| None                                                       | 16 (41%)      | 12 (32%)      | 0.06  |

Note: P value for age derived from quantile regression which compares medians; all the other p-values are derived from Fishers' exact test

eTable 9 - Ambulatory response at 8 weeks by location of SSC site

|                                                        | Intention to treat population |            |                 | Per protocol population |            |                 |
|--------------------------------------------------------|-------------------------------|------------|-----------------|-------------------------|------------|-----------------|
|                                                        | 8 Gy/1f                       | 20 Gy/5f   | Risk difference | 8 Gy/1f                 | 20 Gy/5f   | Risk difference |
|                                                        | N (%)                         | N (%)      | (90% CI)        | N (%)                   | N (%)      | (90% CI)        |
|                                                        |                               |            | 8 Gy-20Gy       |                         |            | 8 Gy-20Gy       |
| <b>Group 1 - Location of SSC site within C1 to T12</b> |                               |            |                 |                         |            |                 |
| Evaluables                                             | 108                           | 124        | <b>-1.0%</b>    | 108                     | 122        | <b>-1.3%</b>    |
| Positive response                                      | 73 (67.6%)                    | 85 (68.6)  | -11.1% to 9.1%  | 73 (67.6%)              | 84 (68.9%) | -11.4% to 8.9%  |
| <b>Group 2 - Location of SSC site within L1 to S2</b>  |                               |            |                 |                         |            |                 |
| Evaluables                                             | 47                            | 41         | <b>-8.8%</b>    | 46                      | 40         | <b>-9.2%</b>    |
| Positive response                                      | 36 (76.6%)                    | 35 (85.4%) | -22.4% to 4.9%  | 36 (78.3%)              | 35 (87.5%) | -22.4% to 4.0%  |
| <b>Group 3 - Location of SSC site within T6 to L5</b>  |                               |            |                 |                         |            |                 |
| Evaluables                                             | 11                            | 9          | <b>-12.1%</b>   | 10                      | 9          | <b>-16.7%</b>   |
| Positive response                                      | 6 (54.6%)                     | 6 (66.7%)  | -47.9% to 23.6% | 5 (50.0%)               | 6 (66.7%)  | -53.3% to 20.0% |

Note: The total is 340 instead of 342 because two patients had unknown location of SSC site (it was not reported at baseline)

eTable 10 – Quality of life at 4 and 8 weeks by ambulatory response in 20Gy/5f and 8Gy/1f

| Quality of Life scales by ambulation status                       | Ambulatory response |      |             |      | Mean difference adjusted for QoL baseline scores |          |
|-------------------------------------------------------------------|---------------------|------|-------------|------|--------------------------------------------------|----------|
|                                                                   | (Grade 1-2)         |      | (Grade 3-4) |      | (1-2) vs (3-4)<br>(95%CI)                        | p        |
|                                                                   | N                   | Mean | N           | Mean |                                                  |          |
| <b>QoL at 4 weeks according to ambulatory response at 4 weeks</b> |                     |      |             |      |                                                  |          |
| <b>20Gy/5f</b>                                                    |                     |      |             |      |                                                  |          |
| Global health status                                              | 99                  | 45.3 | 37          | 27.0 | 13.4(5.3 to 21.5)                                | 0.001    |
| Physical functioning                                              | 98                  | 44.4 | 37          | 6.9  | 21.9(13.6 to 30.1)                               | p<0.0001 |
| Role functioning                                                  | 98                  | 34.4 | 37          | 2.7  | 23.2(13.1 to 33.3)                               | p<0.0001 |
| Emotional functioning                                             | 99                  | 74.4 | 37          | 69.1 | 2.0(-7.2 to 11.1)                                | 0.67     |
| Cognitive functioning                                             | 99                  | 75.6 | 37          | 64.9 | 7.4(-1.9 to 16.7)                                | 0.12     |
| Social functioning                                                | 98                  | 49.5 | 37          | 14.4 | 23.0(11.0 to 35.0)                               | p<0.0001 |
| <b>8Gy/1f</b>                                                     |                     |      |             |      |                                                  |          |
| Global health status                                              | 105                 | 46.8 | 39          | 28.0 | 15.2(7.5 to 22.9)                                | p<0.0001 |
| Physical functioning                                              | 105                 | 43.4 | 39          | 3.2  | 29.6(20.9 to 38.4)                               | p<0.0001 |
| Role functioning                                                  | 103                 | 33.5 | 38          | 4.0  | 25.6(15.2 to 36.0)                               | p<0.0001 |
| Emotional functioning                                             | 105                 | 74.0 | 39          | 66.3 | 7.5(-0.8 to 15.7)                                | 0.08     |
| Cognitive functioning                                             | 105                 | 79.0 | 39          | 66.7 | 8.6(-0.01 to 17.1)                               | 0.05     |
| Social functioning                                                | 105                 | 40.3 | 39          | 18.6 | 16.0(5.3 to 26.7)                                | 0.004    |
| <b>QoL at 8 weeks according to ambulatory response at 8 weeks</b> |                     |      |             |      |                                                  |          |
| <b>20Gy/5f</b>                                                    |                     |      |             |      |                                                  |          |
| Global health status                                              | 81                  | 48.6 | 26          | 33.0 | 14.0(4.3 to 23.7)                                | 0.005    |
| Physical functioning                                              | 82                  | 43.7 | 26          | 6.9  | 27.6(17.2 to 38.0)                               | p<0.0001 |
| Role functioning                                                  | 81                  | 34.6 | 27          | 8.0  | 24.0(11.7 to 36.3)                               | p<0.0001 |
| Emotional functioning                                             | 82                  | 74.2 | 26          | 69.6 | 0.8(-8.7 to 10.1)                                | 0.88     |
| Cognitive functioning                                             | 82                  | 77.0 | 26          | 75.6 | 1.3(-8.7 to 11.2)                                | 0.80     |
| Social functioning                                                | 81                  | 50.0 | 26          | 11.5 | 32.1(18.8 to 45.6)                               | p<0.0001 |
| <b>8Gy/1f</b>                                                     |                     |      |             |      |                                                  |          |
| Global health status                                              | 83                  | 45.9 | 22          | 31.8 | 11.0(-1.0 to 23.0)                               | 0.07     |
| Physical functioning                                              | 83                  | 45.5 | 22          | 3.2  | 34.5(21.4 to 47.7)                               | p<0.0001 |
| Role functioning                                                  | 82                  | 35.9 | 22          | 5.3  | 27.2(12.8 to 41.7)                               | p<0.0001 |
| Emotional functioning                                             | 82                  | 70.0 | 22          | 61.0 | 5.3(-7.5 to 18.1)                                | 0.41     |
| Cognitive functioning                                             | 82                  | 74.3 | 22          | 69.7 | 1.8(-11.0 to 14.6)                               | 0.78     |
| Social functioning                                                | 82                  | 45.7 | 22          | 18.2 | 18.1(2.2 to 34.0)                                | 0.03     |

Ambulatory status - Grade 1-2: able to walk/mobile. Grade 3-4: unable to walk easily/not mobile.

All QoL scores are on a scale 0-100, where a high score indicates good health. Hence a positive mean difference indicates that QoL is better among patients with ambulatory grades 1-2.





eFigure 1 - Ambulatory status by randomization group

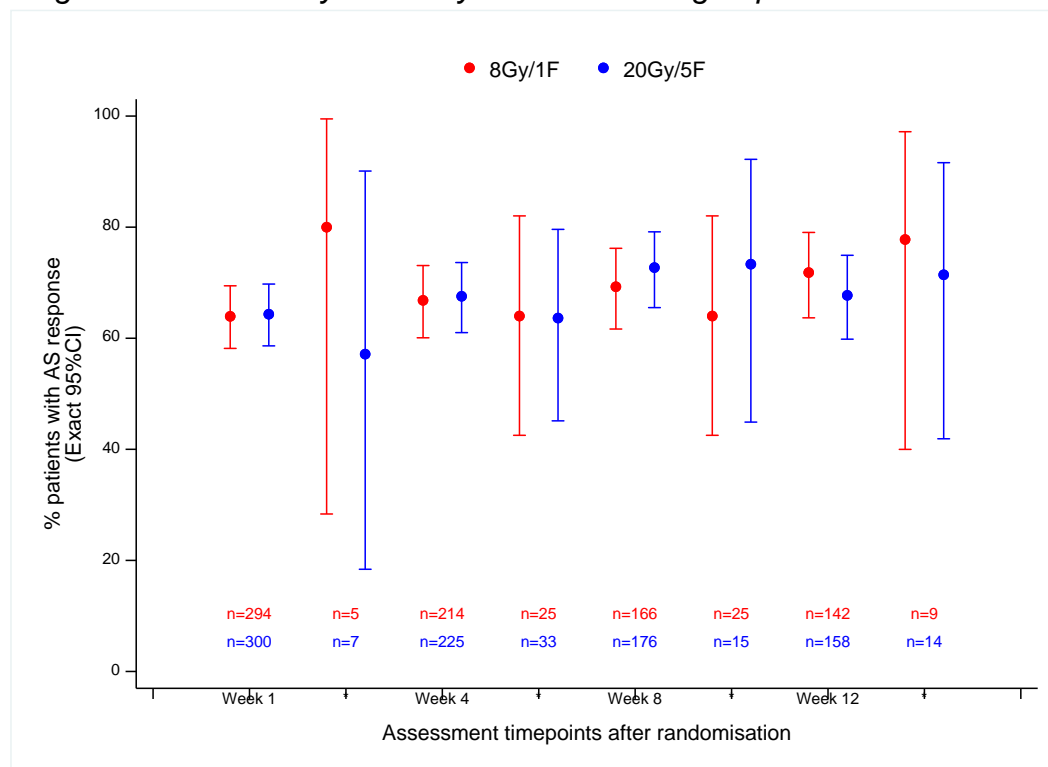

Note: Week 1 is between day 7 and 13 inclusive after randomization. Week 4 is between day 21 to 34 inclusive after randomization. Week 8 is between day 49 to 62 inclusive after randomization. Week 12 is between day 70 to 97 inclusive after randomization.

\* These time points were outside the protocol specified time frames for the assessments and are shown here for completeness

eFigure 2 – Difference in ambulatory status at 8 weeks according to baseline characteristics (99% CIs are shown due to multiple analyses). The protocol pre-specified factors were ambulatory status, primary tumor type and extent of metastases.

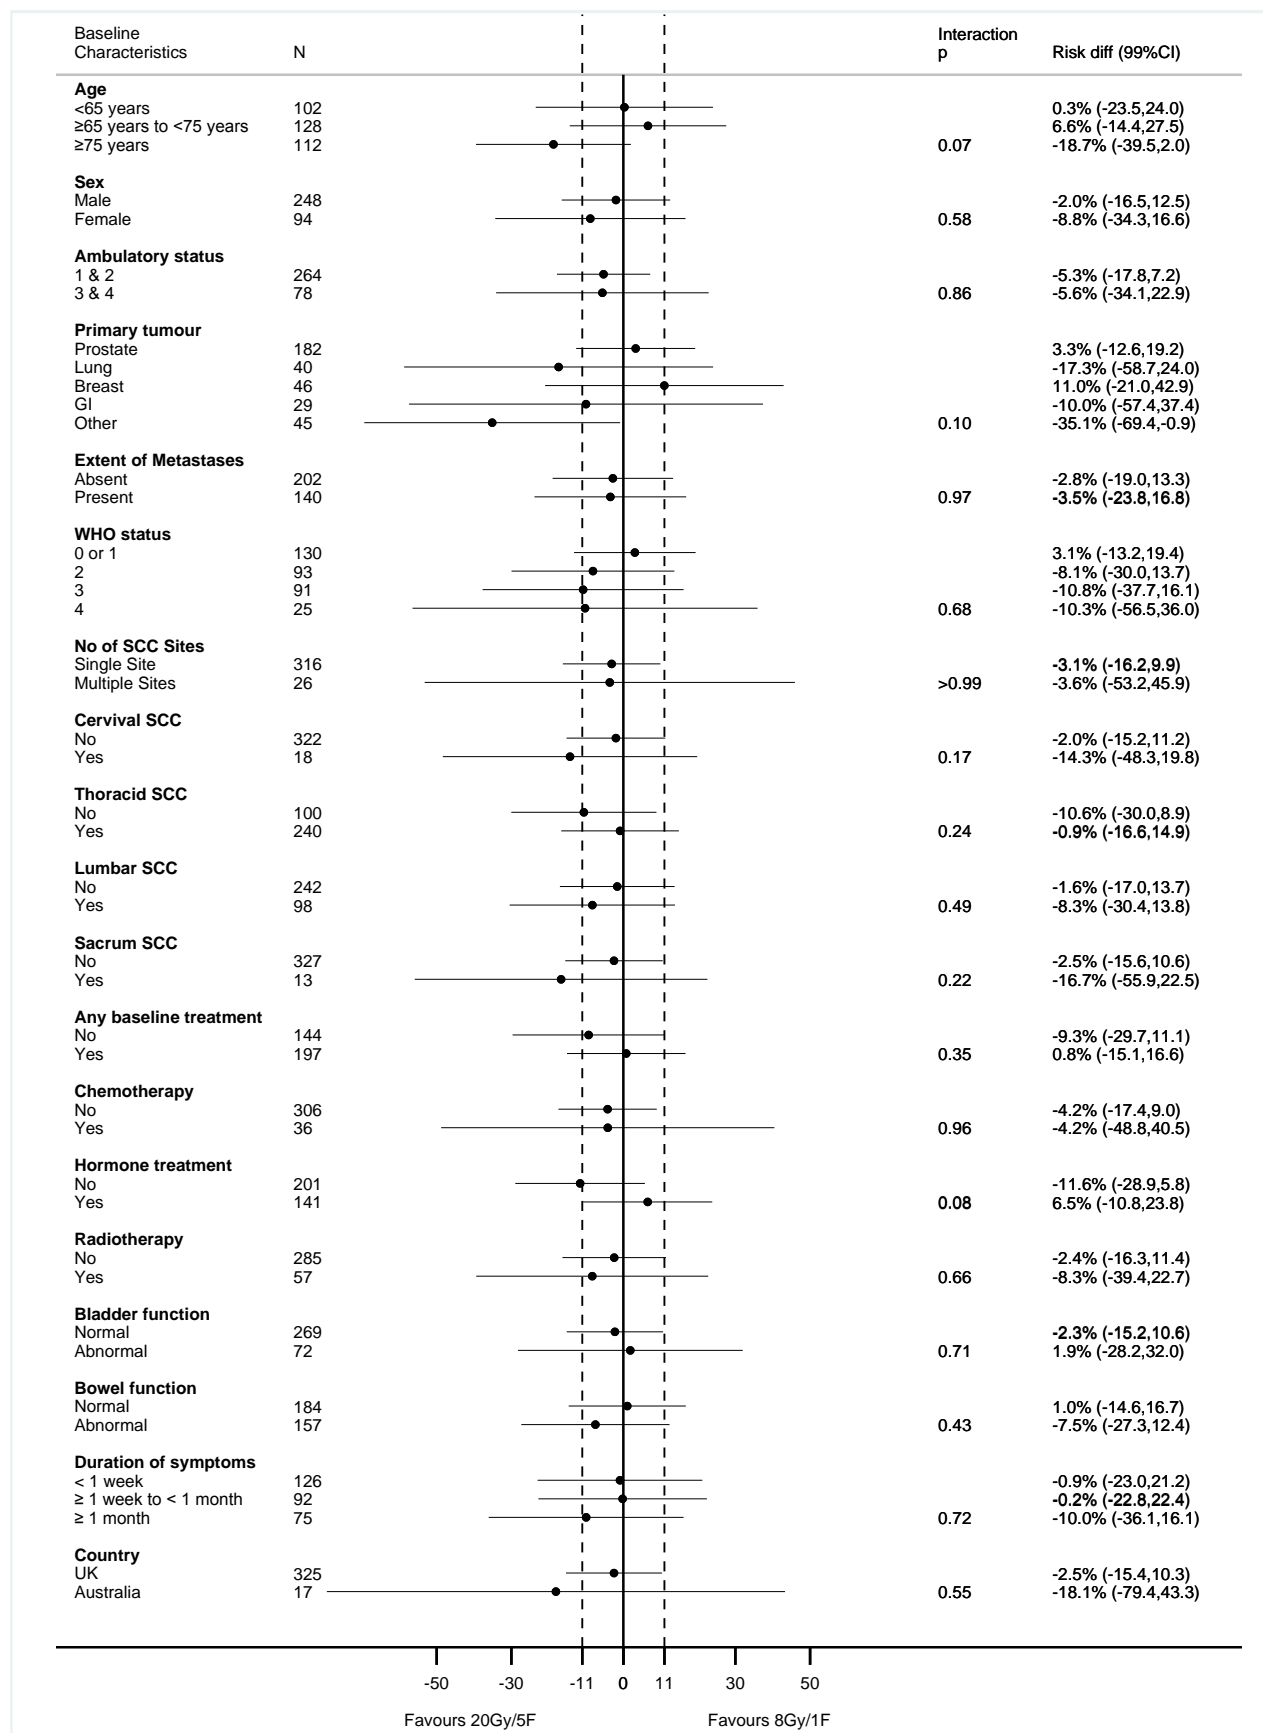

eFigure 3 – Time to loss of ambulation

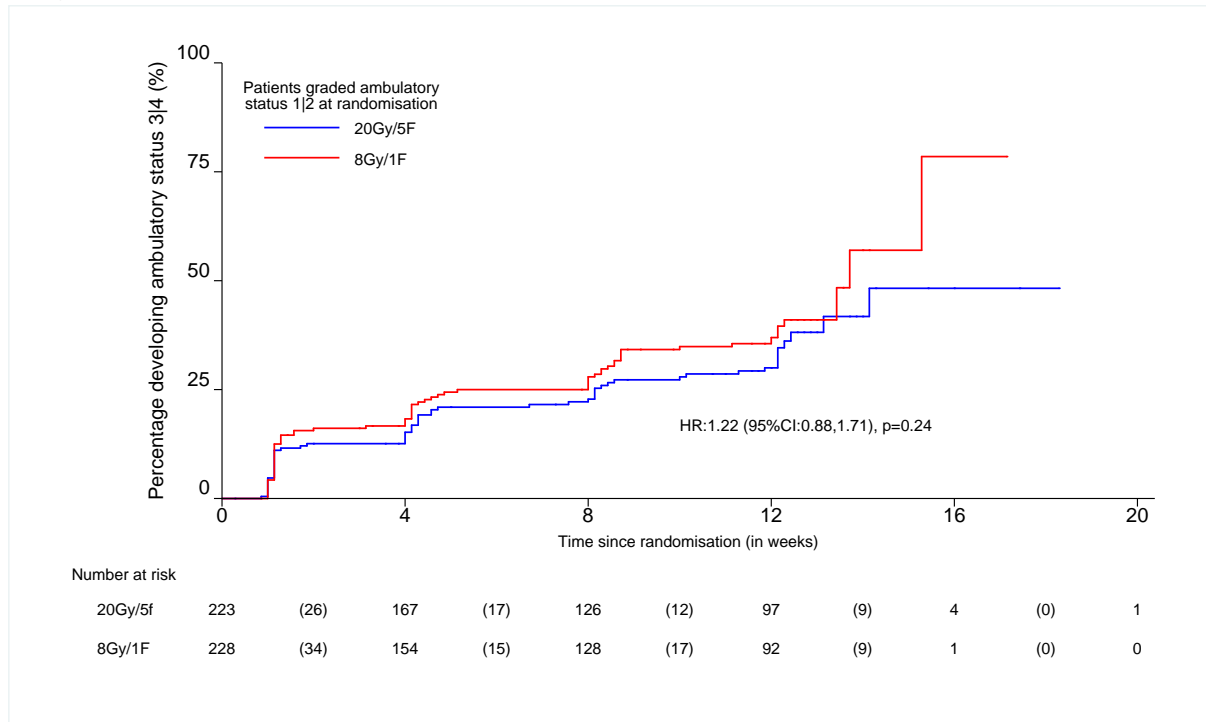

Note: Proportionality assumption test p=0.96

eFigure 4 – Time to recovery of ambulation

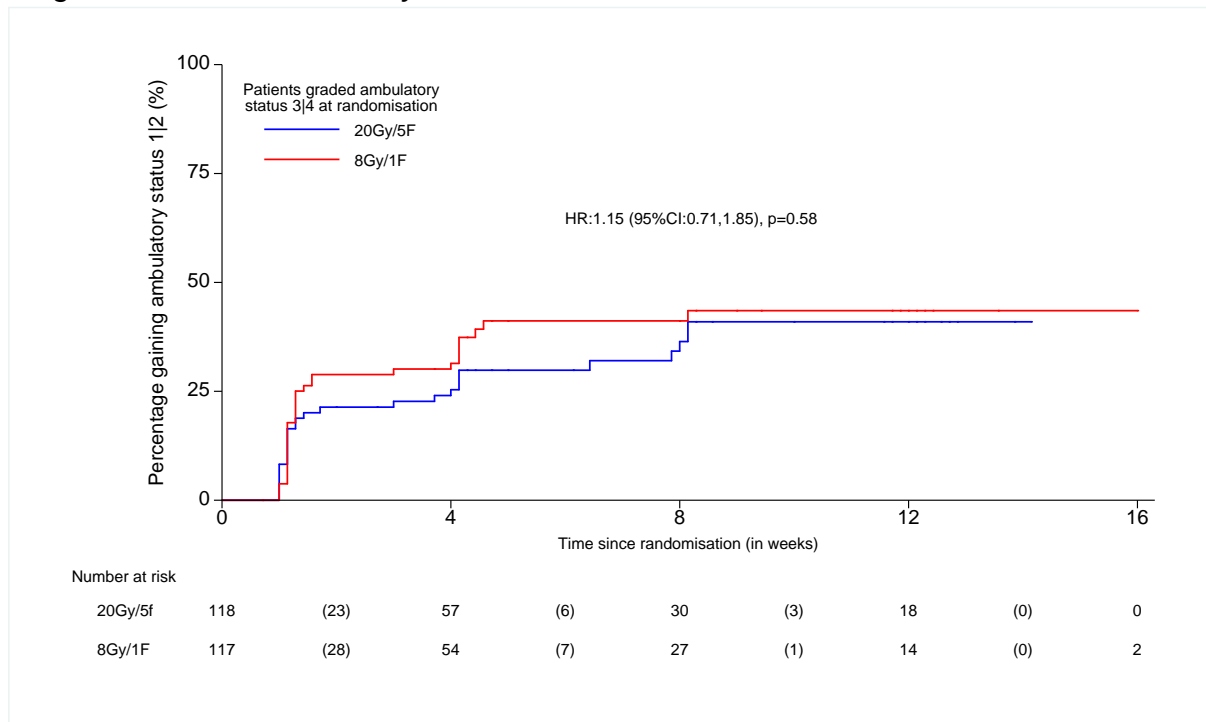

Note: Proportionality assumption test p=0.55

eFigure 5 - Pain scores in 8Gy/1f and in 20Gy/5f

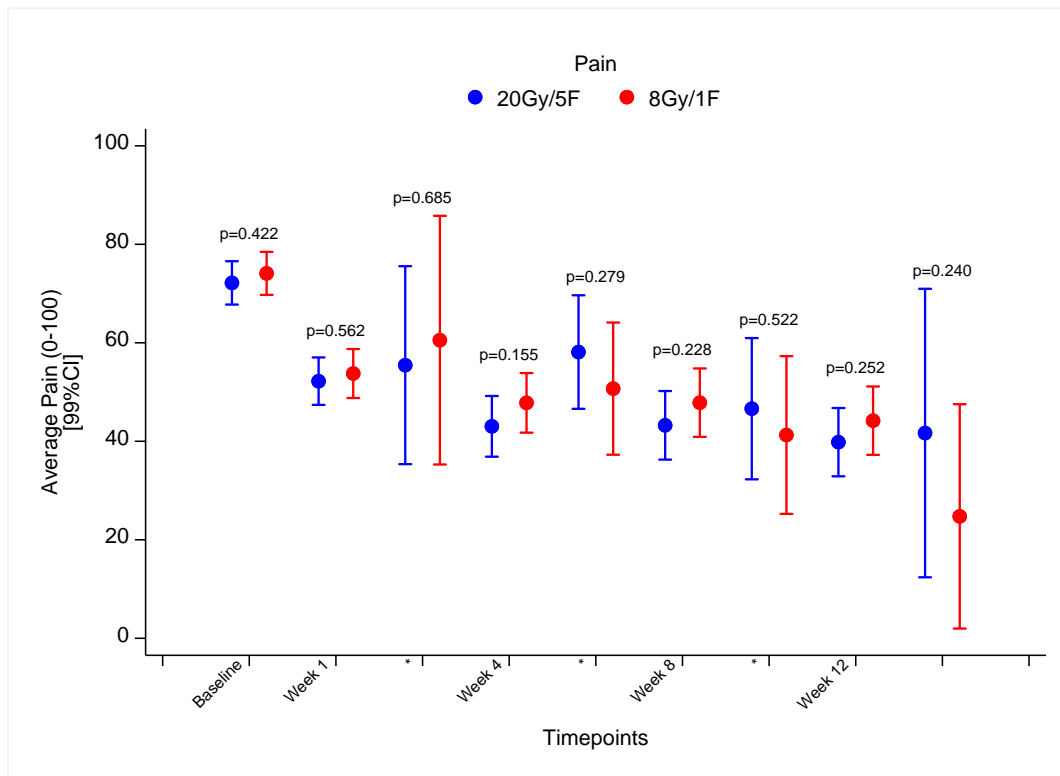

Note: Week 1 is between day 7 and 13 inclusive after randomization. Week 4 is between day 21 to 34 inclusive after randomization. Week 8 is between day 49 to 62 inclusive after randomization. Week 12 is between day 70 to 97 inclusive after randomization.

\* These time points were outside the protocol specified time frames for the assessments and are shown here for completeness.

The figure shows the mean pain score at each time point, adjusted for the baseline score, from a repeated measures mixed model that included an interaction term between time and treatment group.

eFigure 6 - Overall survival (hazard ratio) according to baseline characteristics

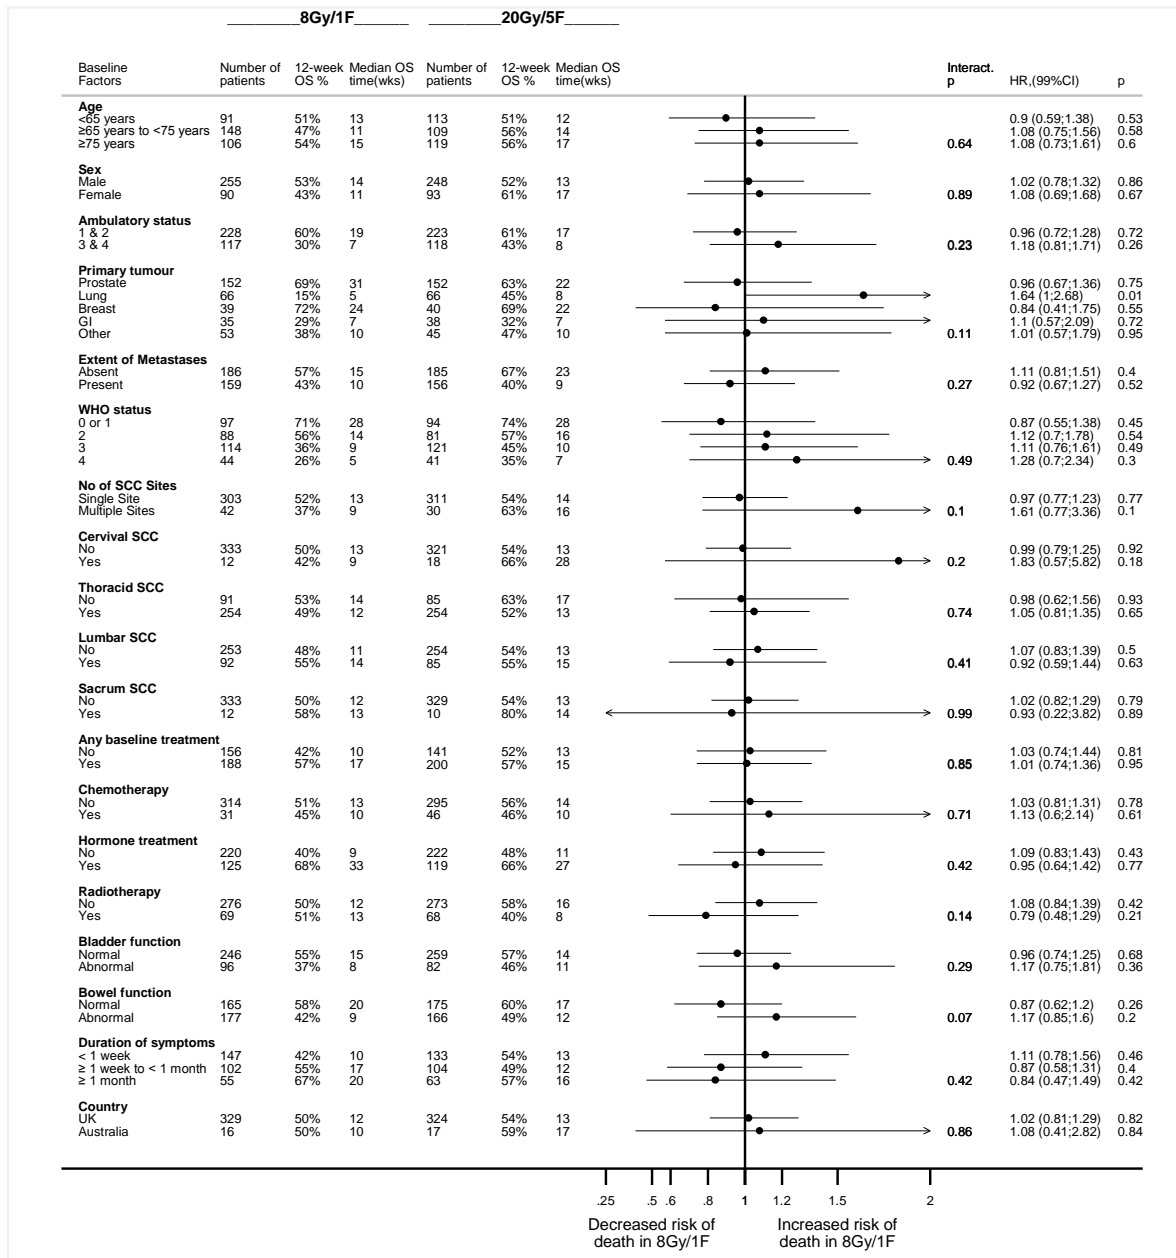

eFigure 7 – Deterioration-free survival

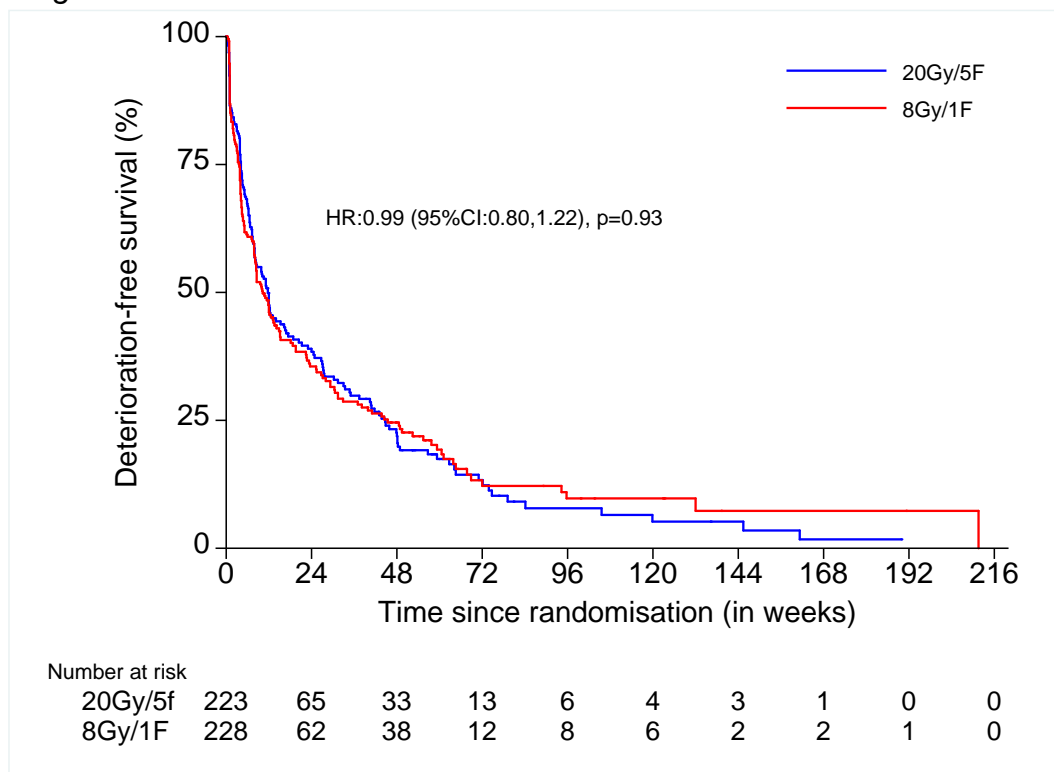

An event is any patient who had ambulatory status grade 1 or 2 at baseline who then deteriorated to grade 3-4 during the trial (mostly within the 12-week time frame, but some assessments went beyond this), or had died at any time, whichever came first. Patients whose ambulatory status did not progress to grade 3 or 4 (mostly within 12 weeks) and did not die were censored at the date last seen alive (acknowledging that some of these patients may have progressed to grade 3-4 after their last ambulatory assessment but we do not have this information).
