# Supplementary material
Source: PubMed Central journal article supplement (PMC6902166)
Supplement: jama-322-2084-s004.pdf [file jama-322-2084-s004.pdf]

## **Data Sharing Statement**

Hoskin. Effect of Single-Fraction vs Multifraction Radiotherapy on Ambulatory Status Among Patients With Spinal Canal Compression From Metastatic Cancer. *JAMA*. Published December 03, 2019. 10.1001/jama.2019.17913

### **Data**

**Data available:** No
